# Supplementary material for: Photo-Fenton self-cleaning membranes with robust flux recovery for an efficient oil/water emulsion separation
Source: Royal Society of Chemistry journal article supplement (doi:10.1039/c9ta00521h), 2019-01-01
Supplement: c9ta00521h1.pdf [file c9ta00521h1.pdf]

## Supporting Information

### **Photo-Fenton self-cleaning membranes with robust flux recovery for efficient oil/water emulsions separation**

Atian Xie<sup>a</sup>, Jiuyun Cui<sup>b</sup>, Jin Yang<sup>a</sup>, Yangyang Chen<sup>a</sup>, Jiangdong Dai<sup>a\*</sup>, Jihui Lang<sup>c</sup>, Chunxiang Li<sup>a</sup>,  
Yongsheng Yan<sup>a\*</sup>

<sup>a</sup>Institute of Green Chemistry and Chemical Technology, School of Chemistry and Chemical  
Engineering, and <sup>b</sup>School of Materials Science and Engineering, Jiangsu University, Zhenjiang  
212013, China

<sup>c</sup>College of Physics, Jilin Normal University, Siping 136000, China

\* Corresponding Author

E-mail: Daijd@mail.ujs.edu.cn, yys@mail.ujs.edu.cn

Tel: +86 0511-88790683; Fax: +86 0511-88791800

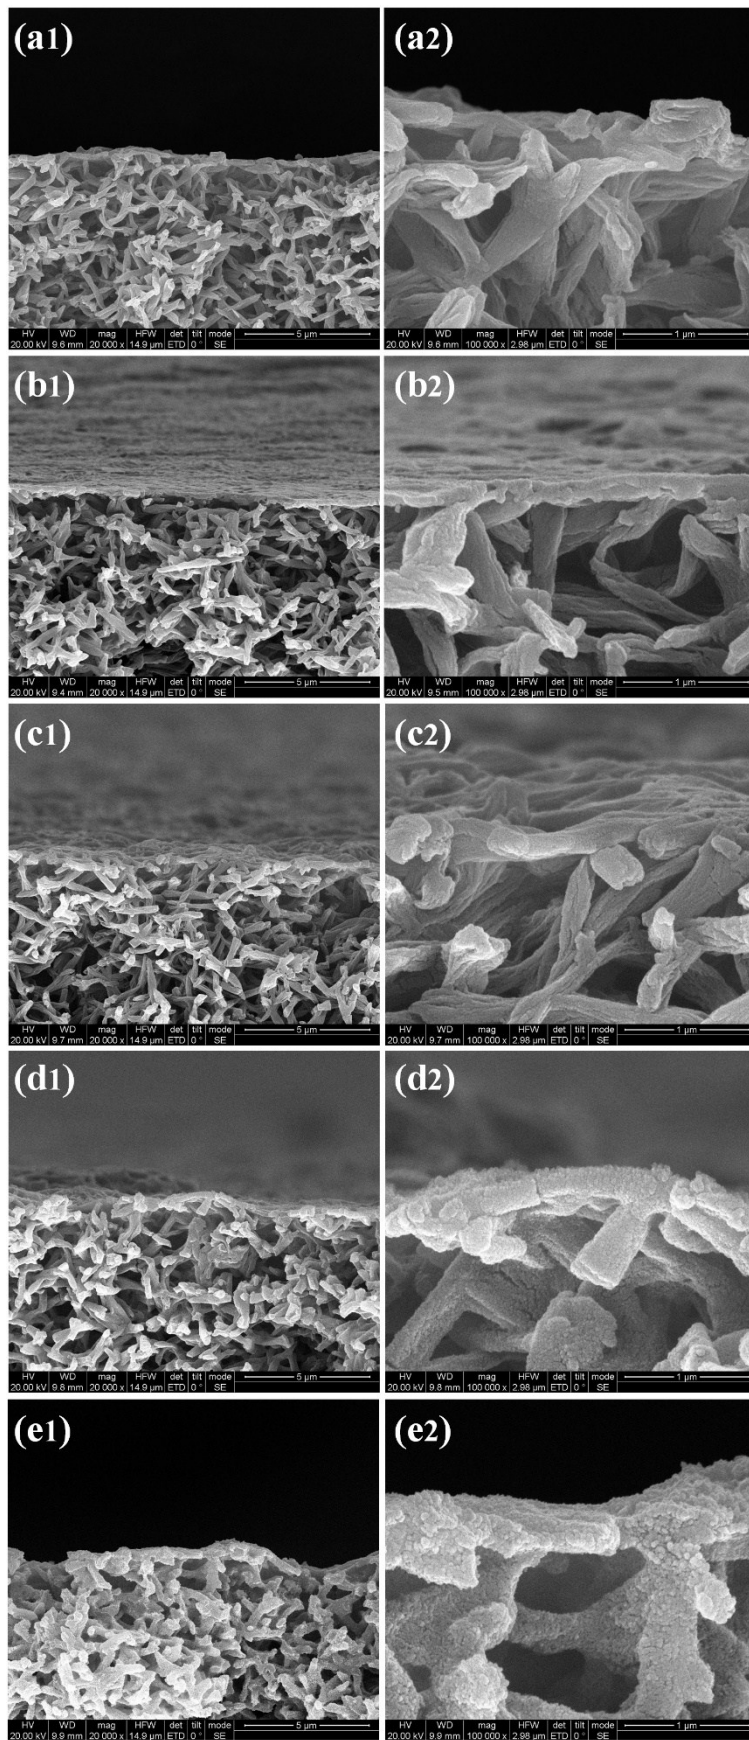

Fig. S1 The cross-sectional SEM images of pristine PVDF (a), PVDF/TA-Fe(III) (b), PVDF/TA/ $\beta$ -FeOOH<sub>x</sub> membranes (c-e)

Table S1 Summary of the properties of the oils

| Composition                     | Viscosity of oils<br>(mPa s <sup>-1</sup> ) | Density<br>(g cm <sup>-3</sup> ) | Surface tension<br>(mN m <sup>-1</sup> ) |
|---------------------------------|---------------------------------------------|----------------------------------|------------------------------------------|
| Toluene                         | 0.59                                        | 0.866                            | 28.53                                    |
| n-hexane                        | 0.33                                        | 0.66                             | 18.4                                     |
| Petroleum ether                 | 0.3                                         | 0.66                             | 18.8                                     |
| Soybean oil <sup>a</sup>        | 50.09                                       | 0.916-0.922                      | 27.6                                     |
| 1,2-dichloroethane <sup>a</sup> | 0.84                                        | 1.245                            | 32.2                                     |

<sup>a</sup>Data from the US National Library of Medicine Hazardous Substance Data Bank (<http://toxnet.nlm.nih.gov/cgi-bin/sis/htmlgen?HSDB>).
